# Supplementary material
Source: publisher site journal article supplement (https://www.dovepress.com/article/170810)
Supplement: Supplementary file 1 [file get_supplementary_file.php]

## Opioid consumption

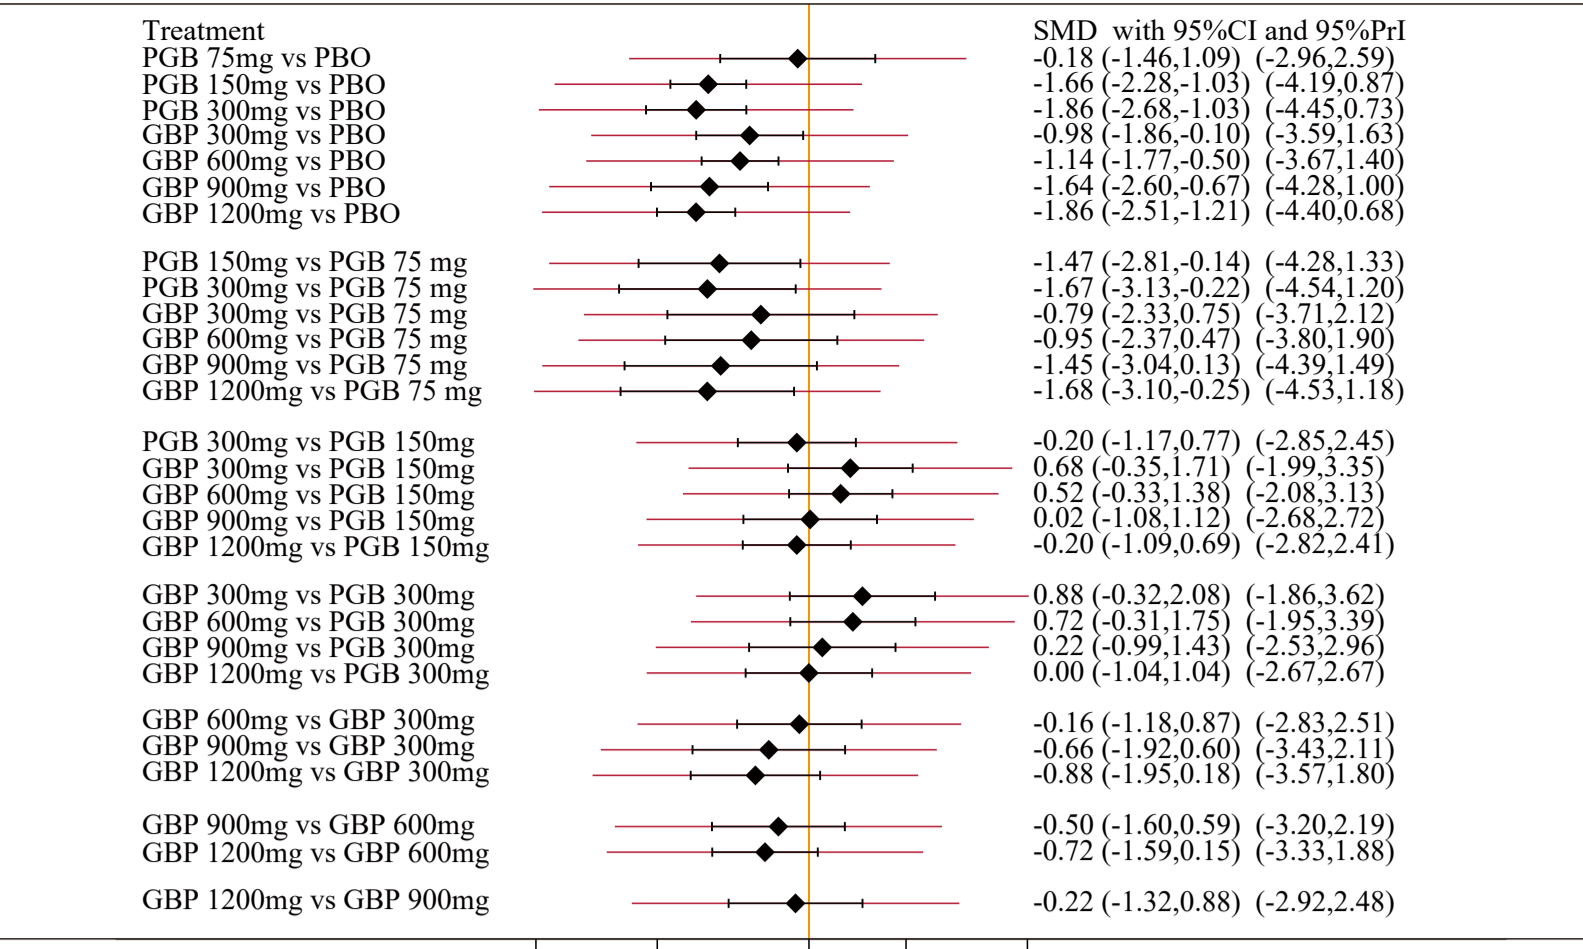

Heterogeneity variance = 1.49

## Pain score at rest

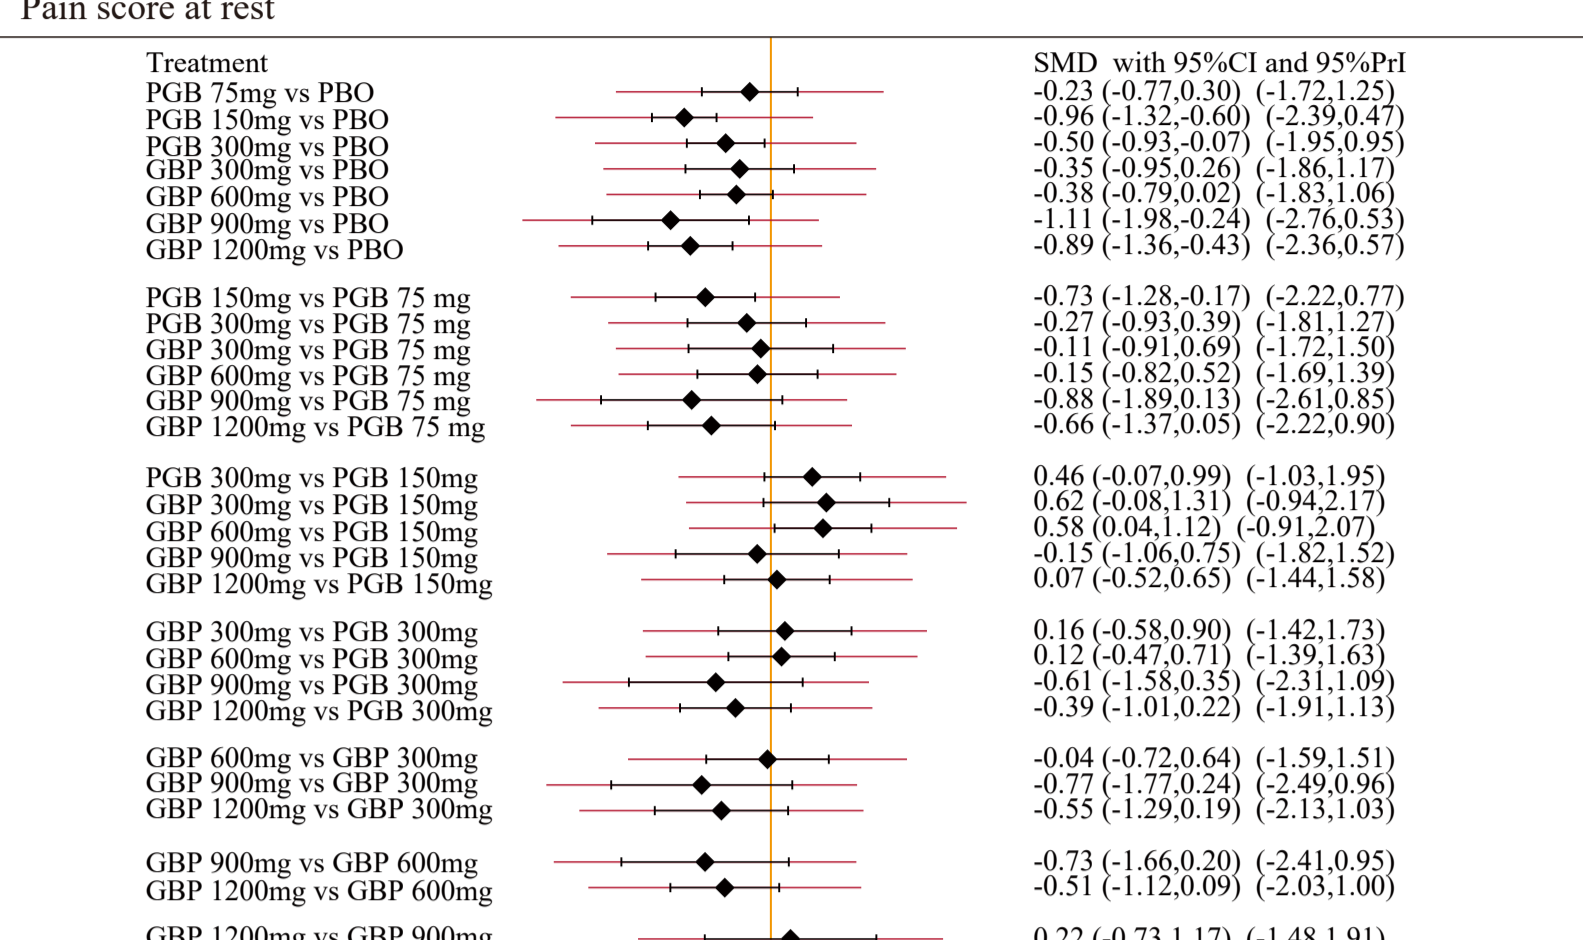

Heterogeneity variance = 0.47

## Pain score at movement

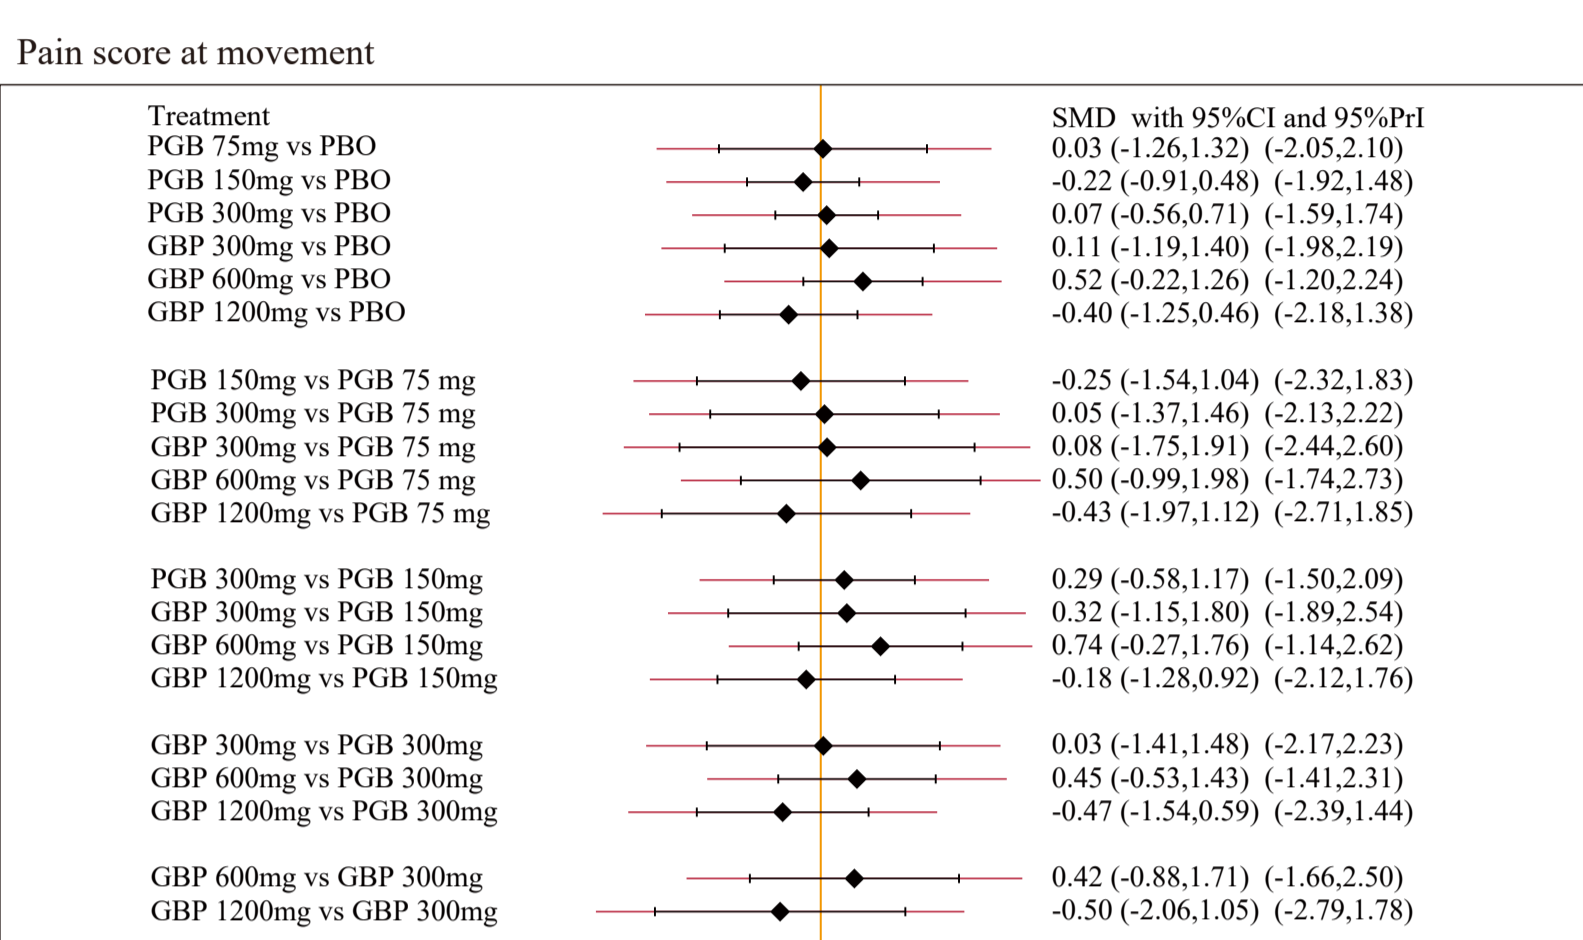

Heterogeneity variance = 0.49

## PONV

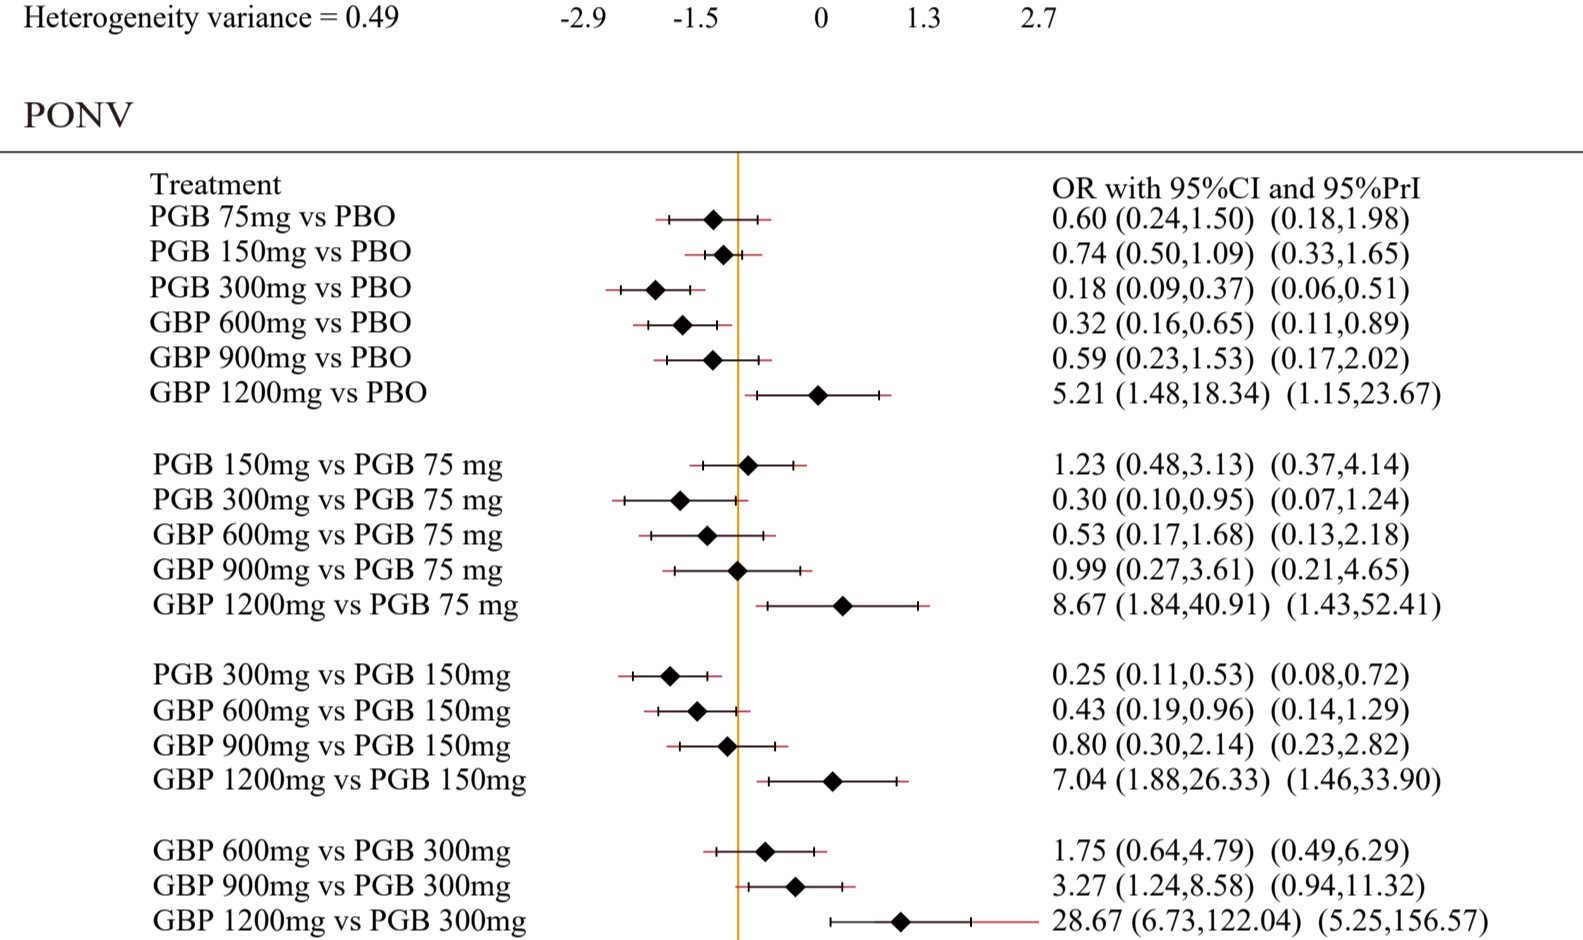

Heterogeneity variance = 0.11

## Nausea

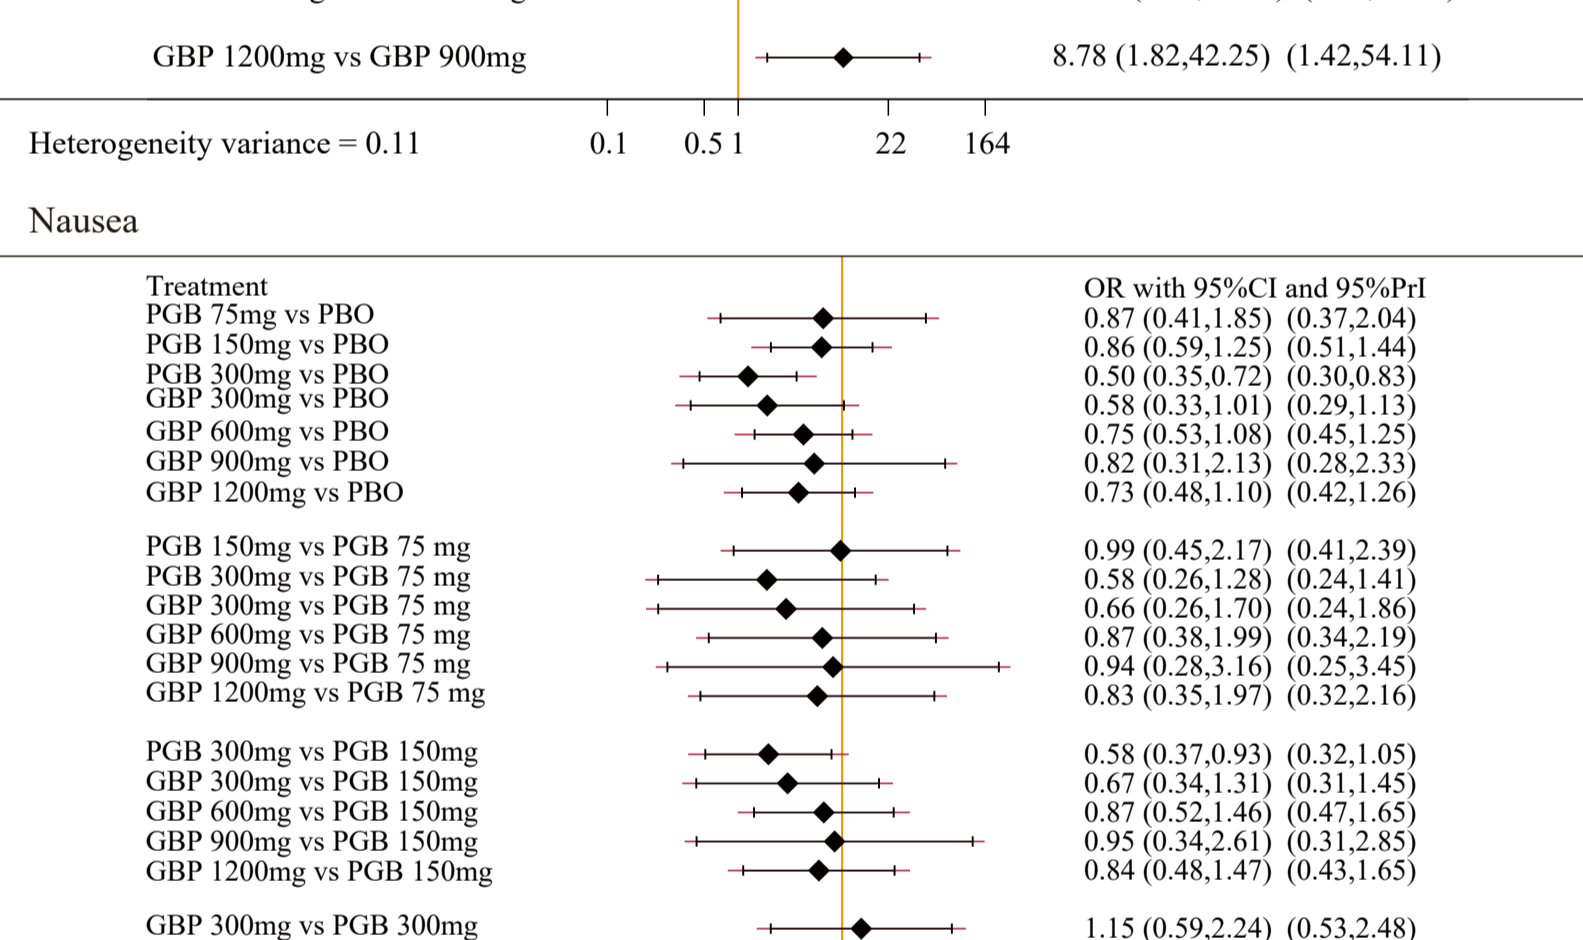

Heterogeneity variance = 0.03

## Vomiting

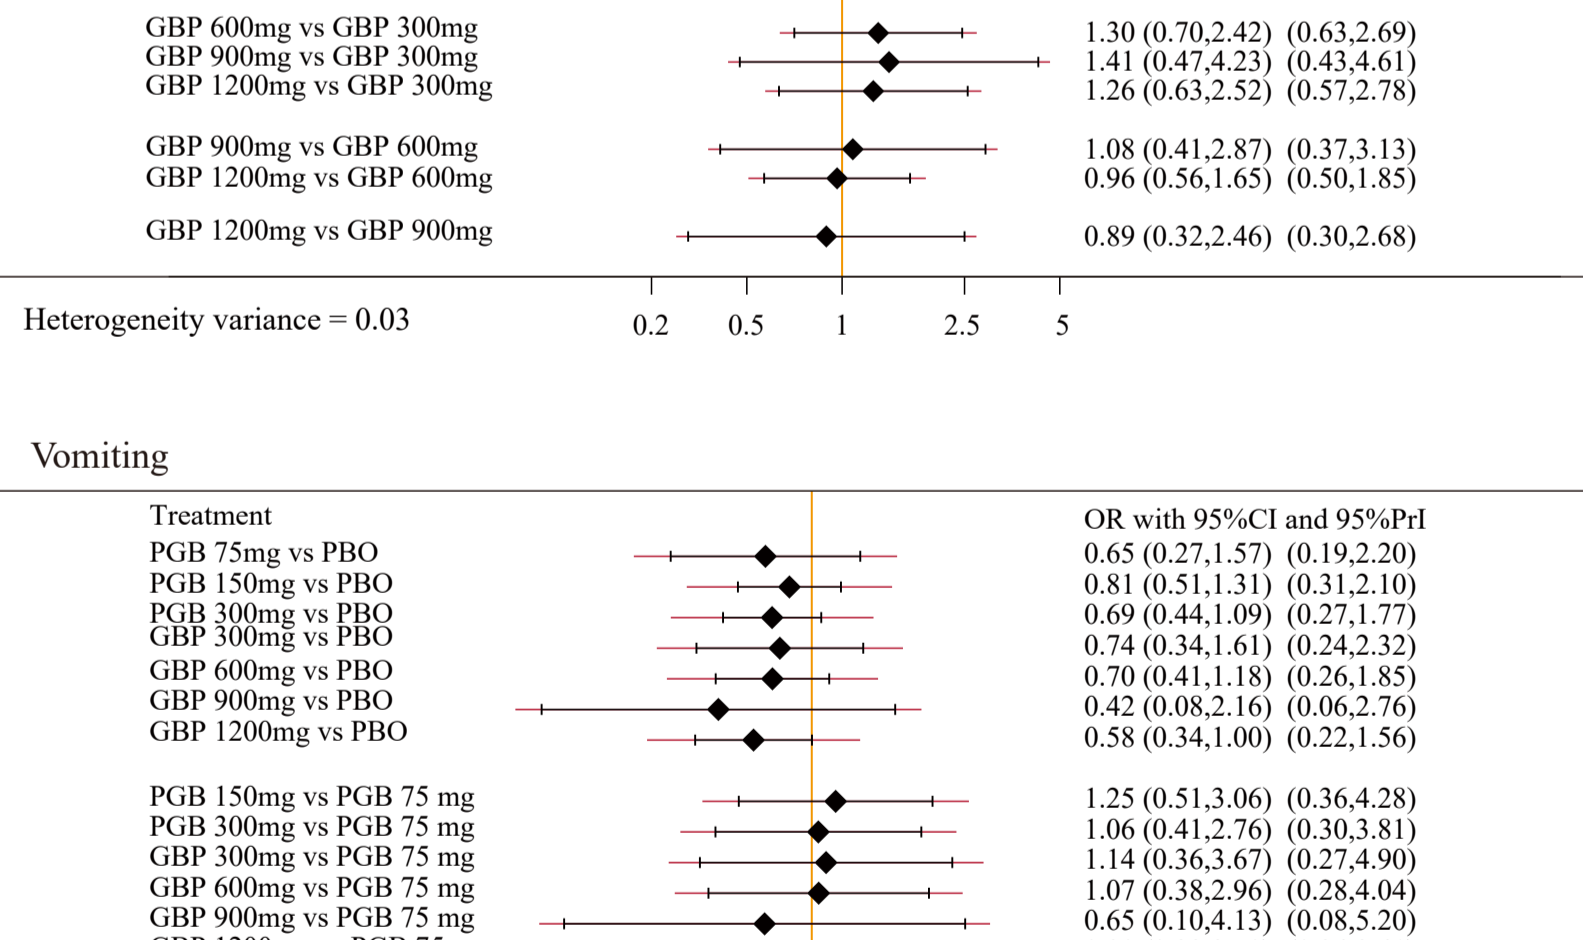

Heterogeneity variance = 0.16

## Dizziness

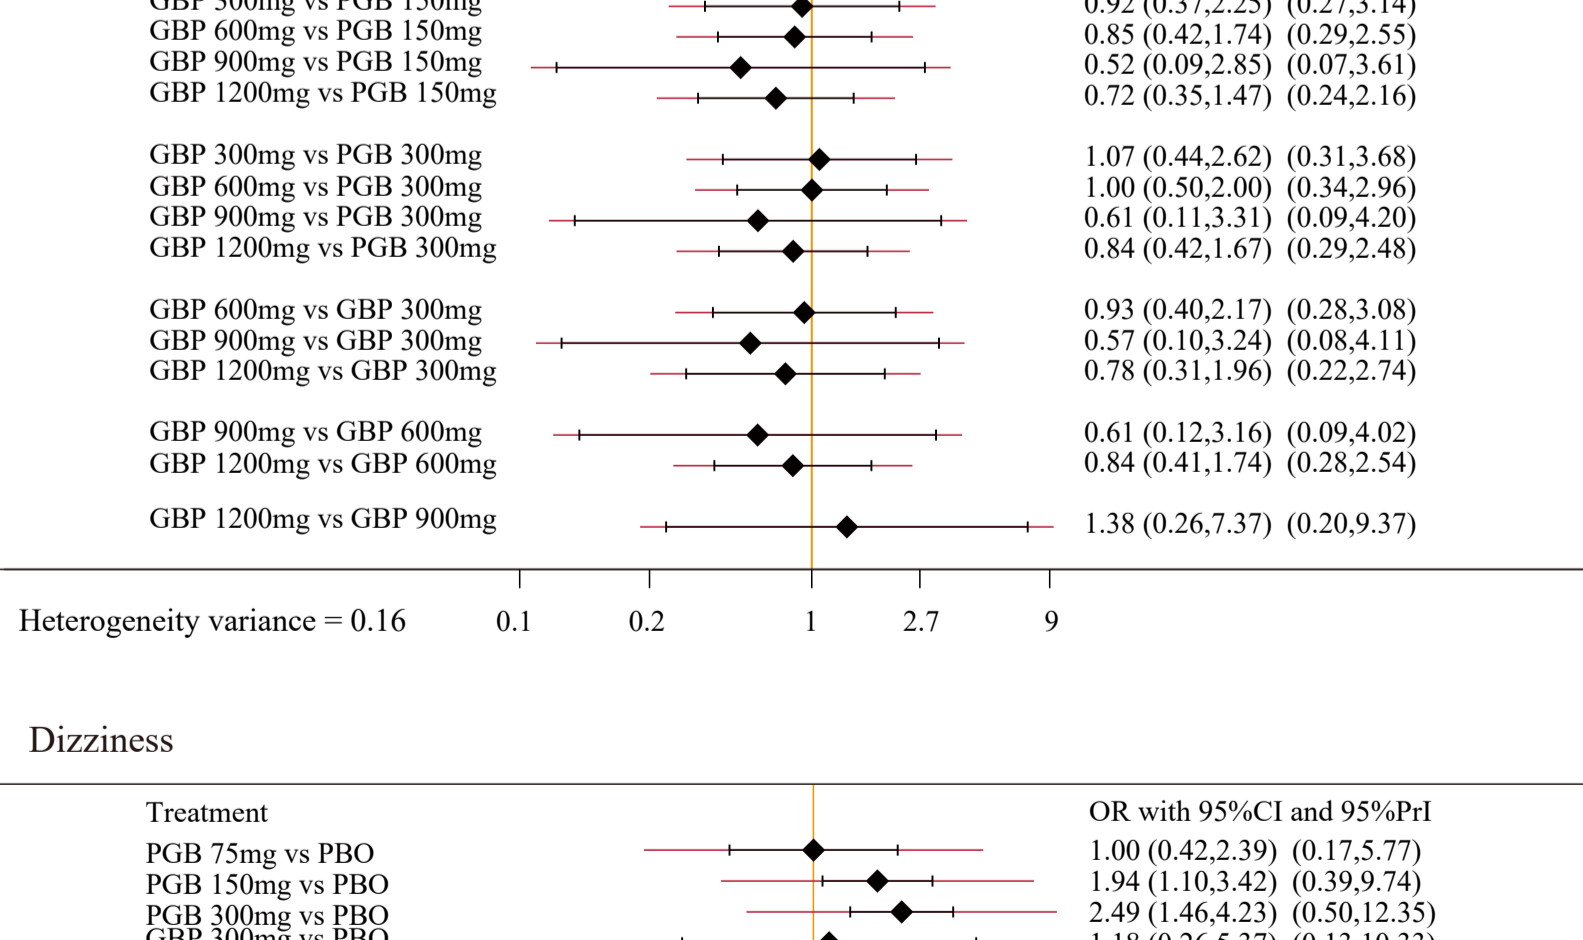

Heterogeneity variance = 0.55

PBO: Placebo; PGB: Pregabalin; GBP: Gabapentin

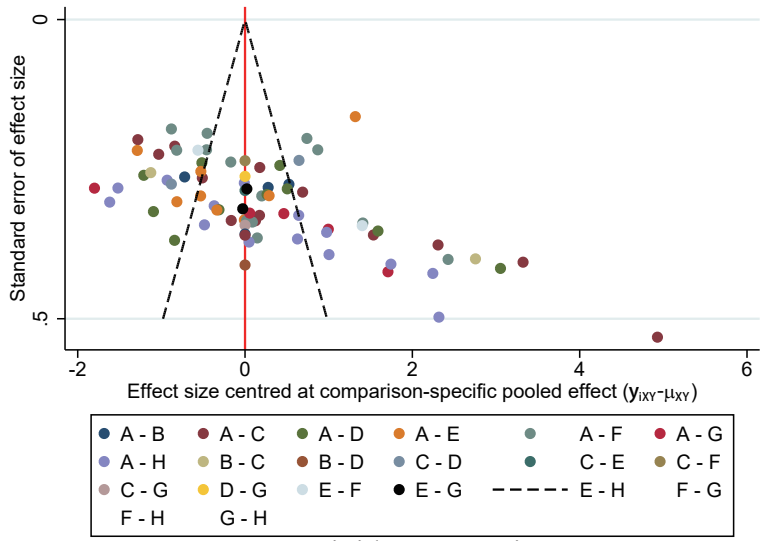

Opioid consumption

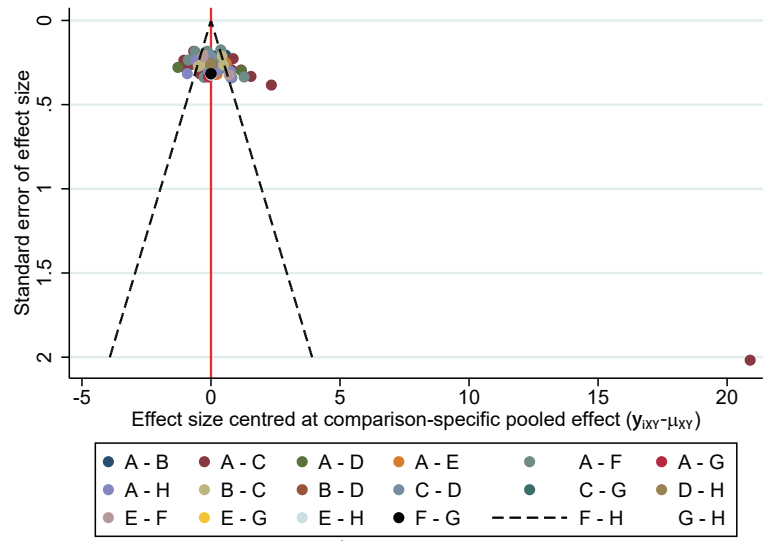

Pain score at rest

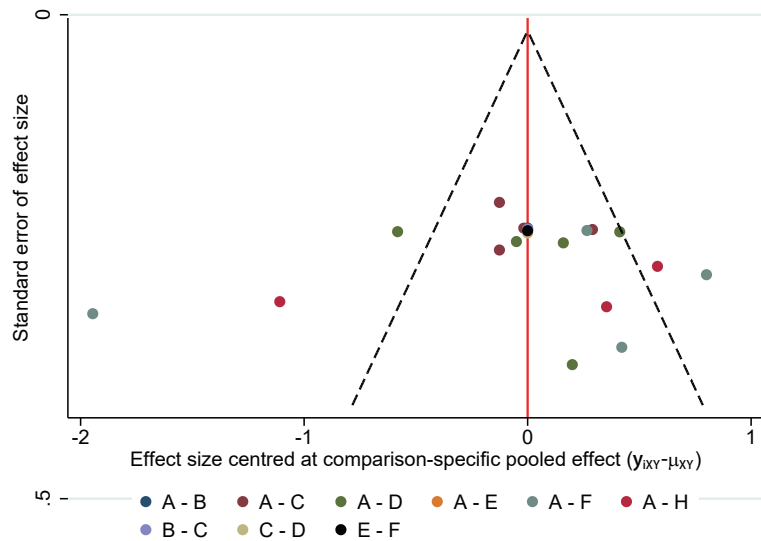

Pain score with movement

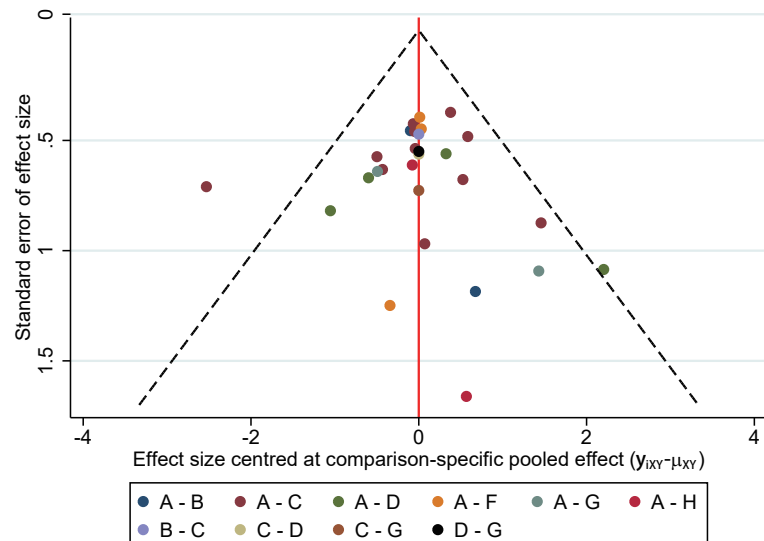

PONV

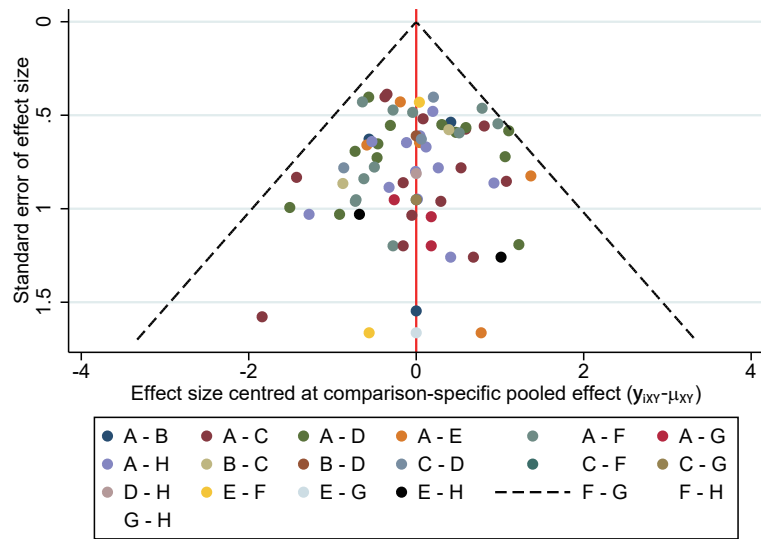

Nausea

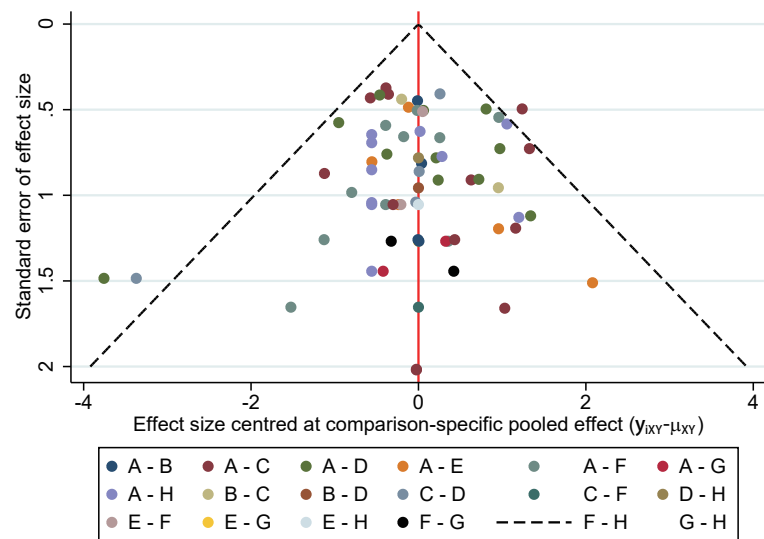

Vomiting

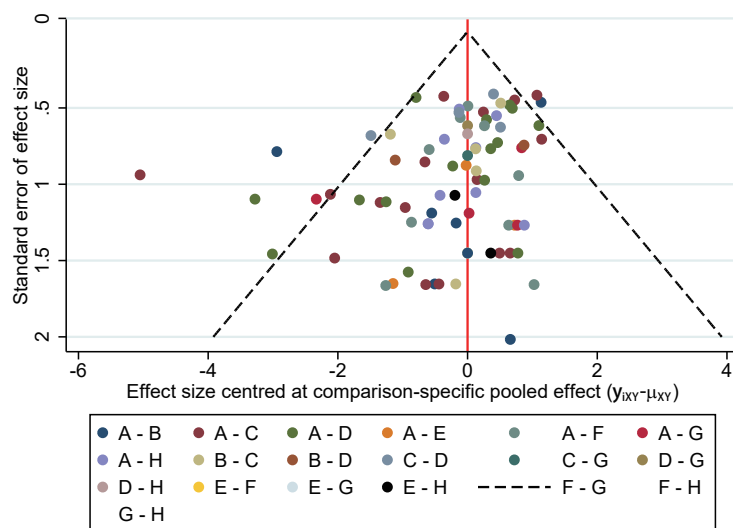

Dizziness



Supplementary material Figure S3

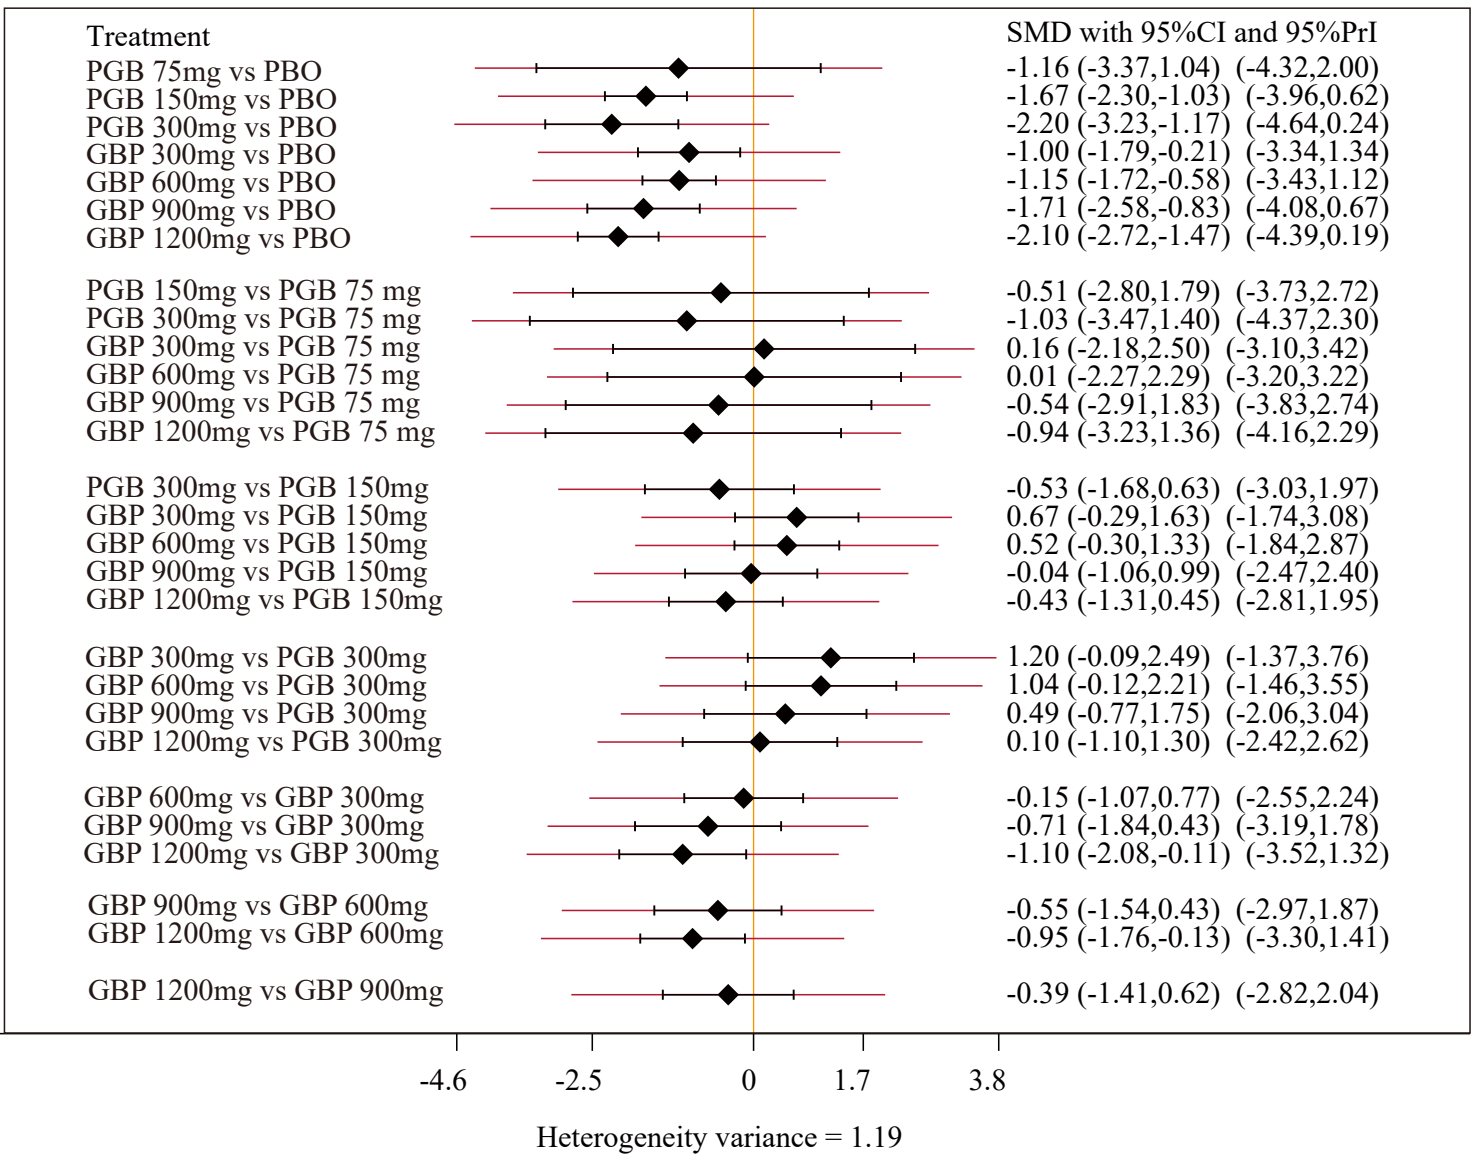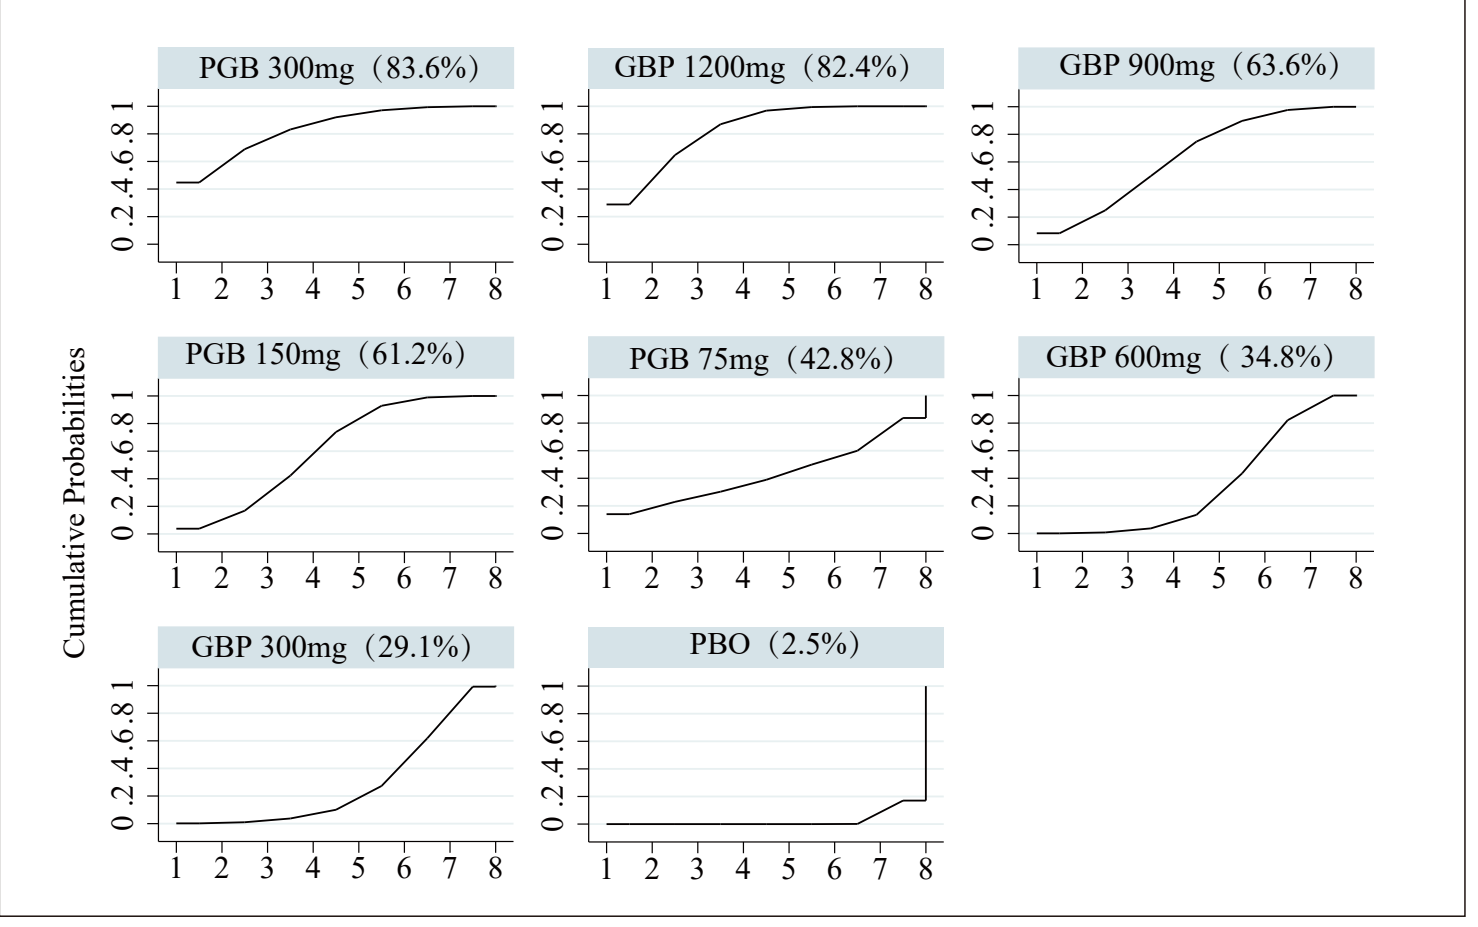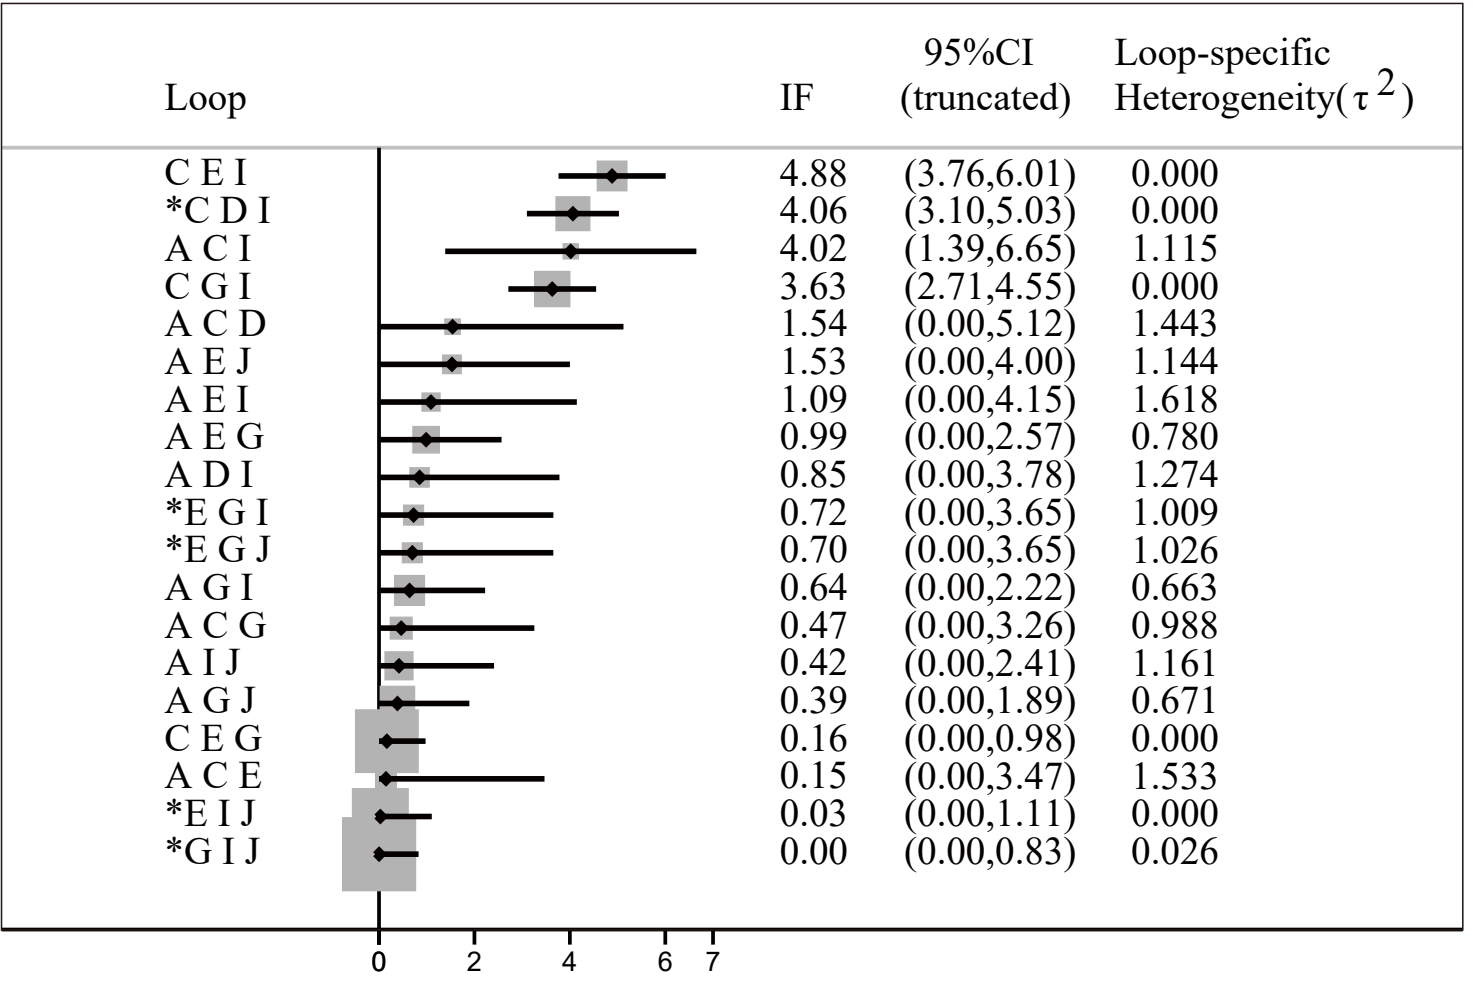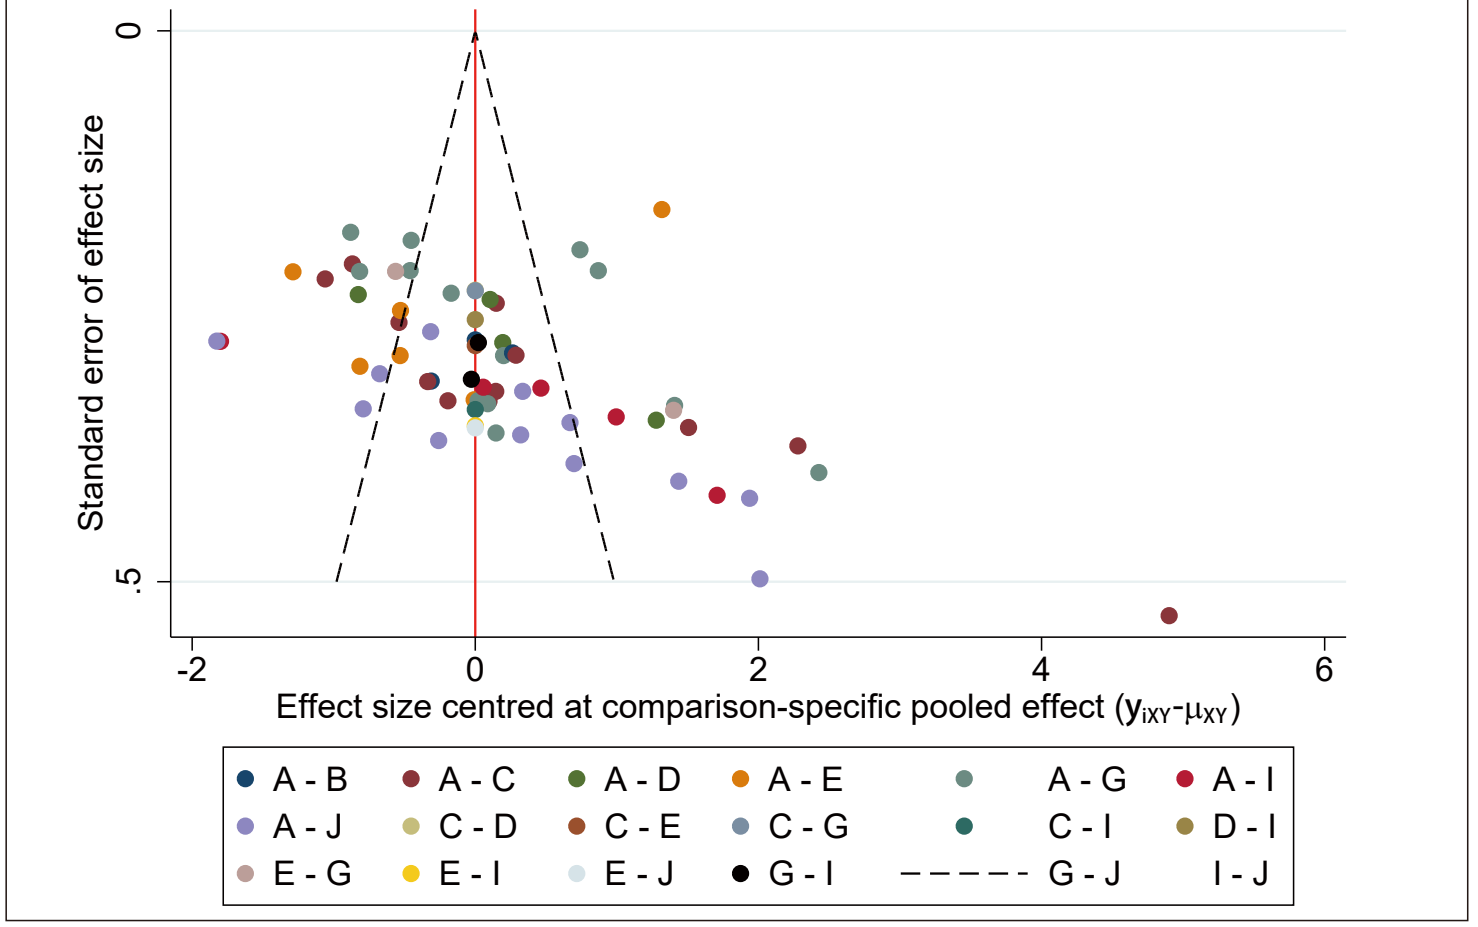

PBO: Placebo; PGB: Pregabalin; GBP: Gabapentin

Opioid consumption

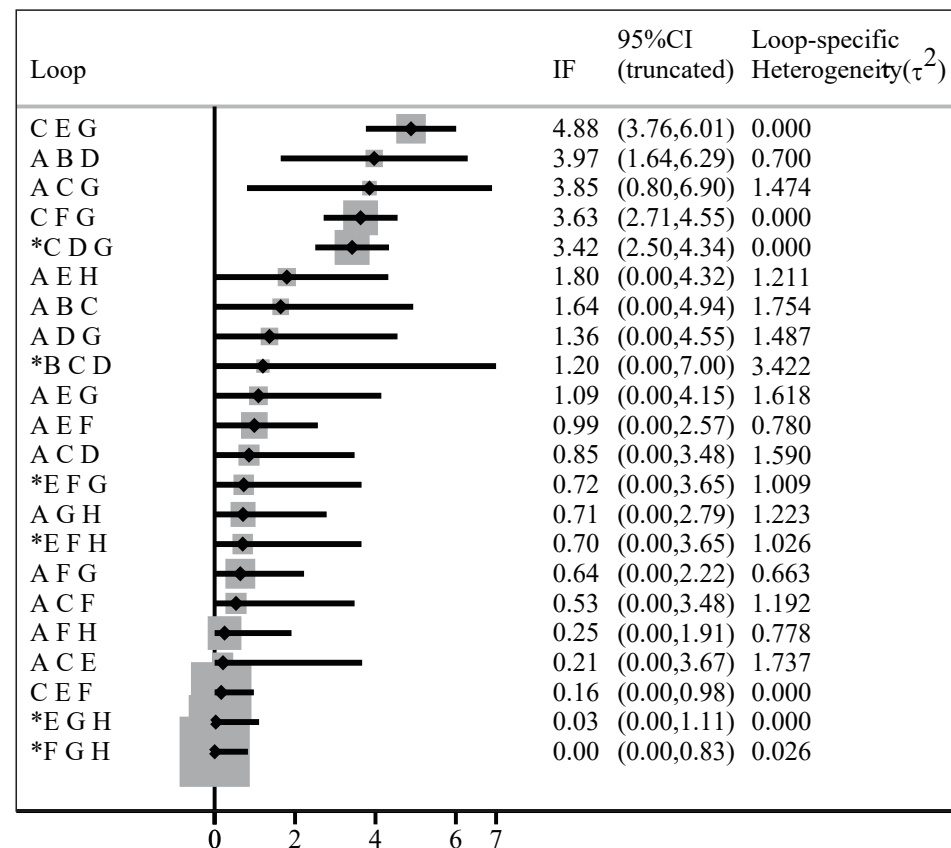

Nausea

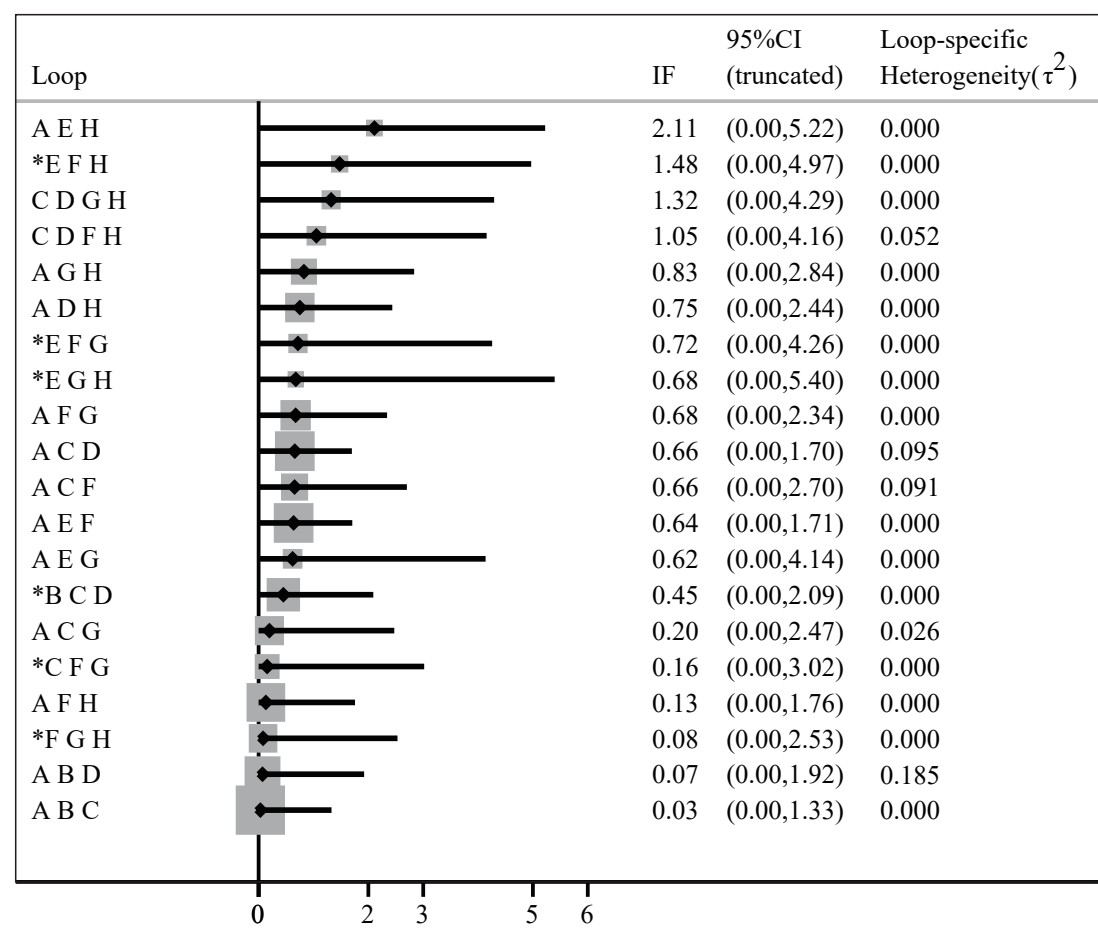

Pain score at rest

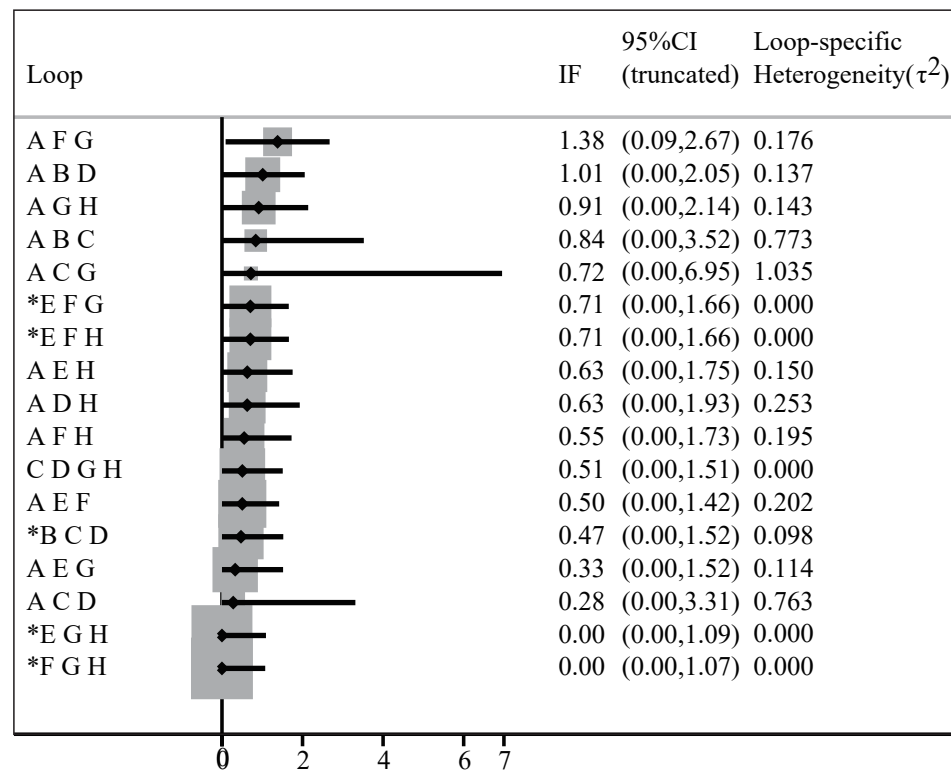

Vomiting

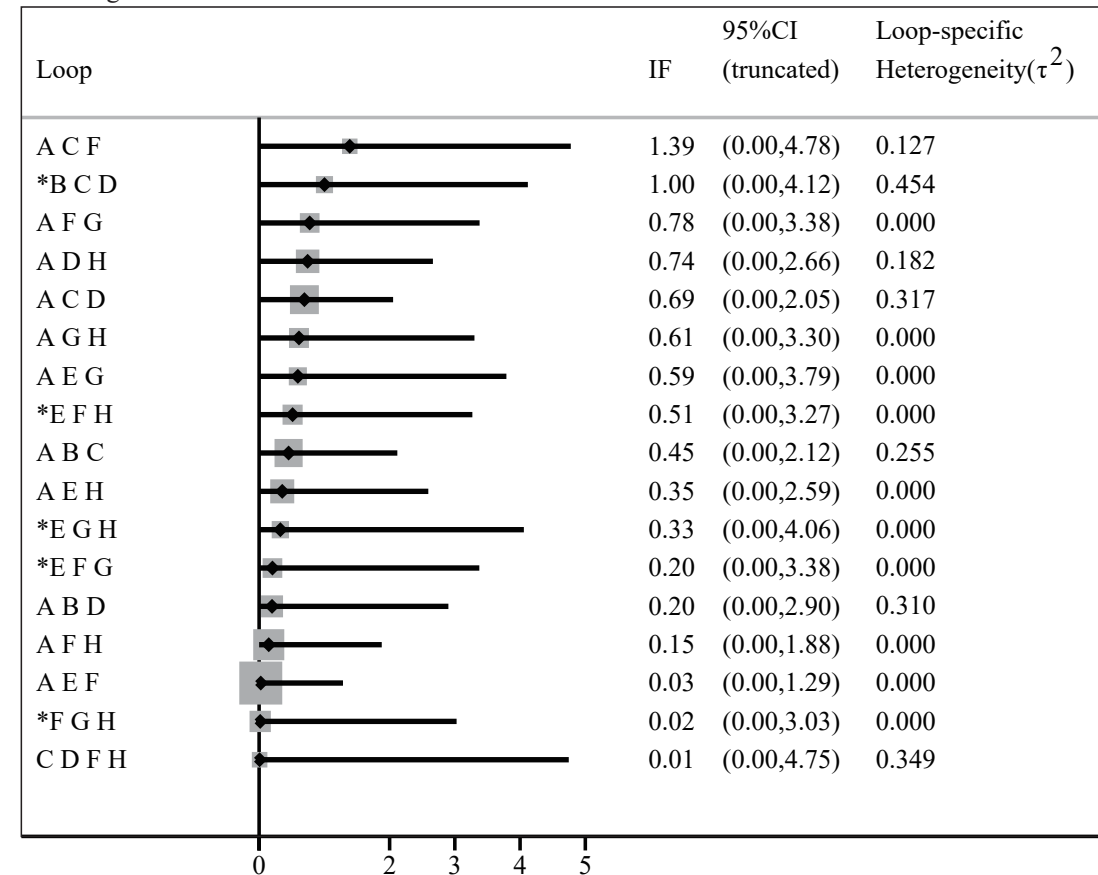

Pain score with movement

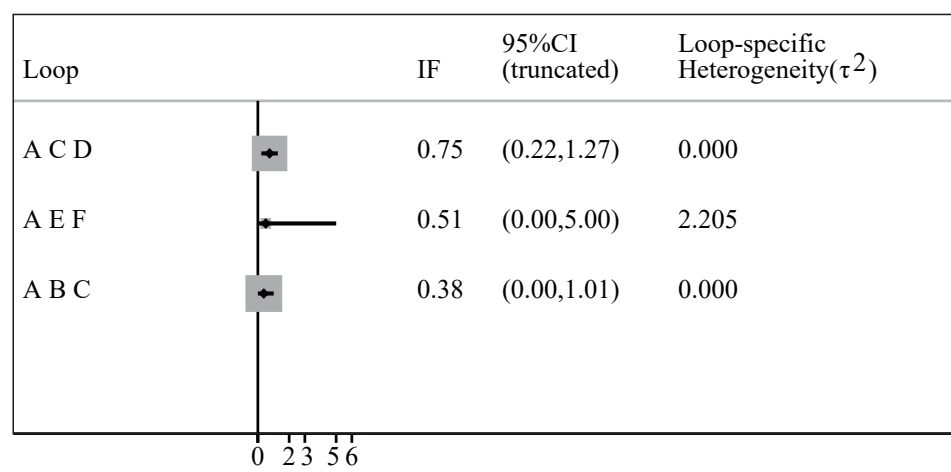

Dizziness

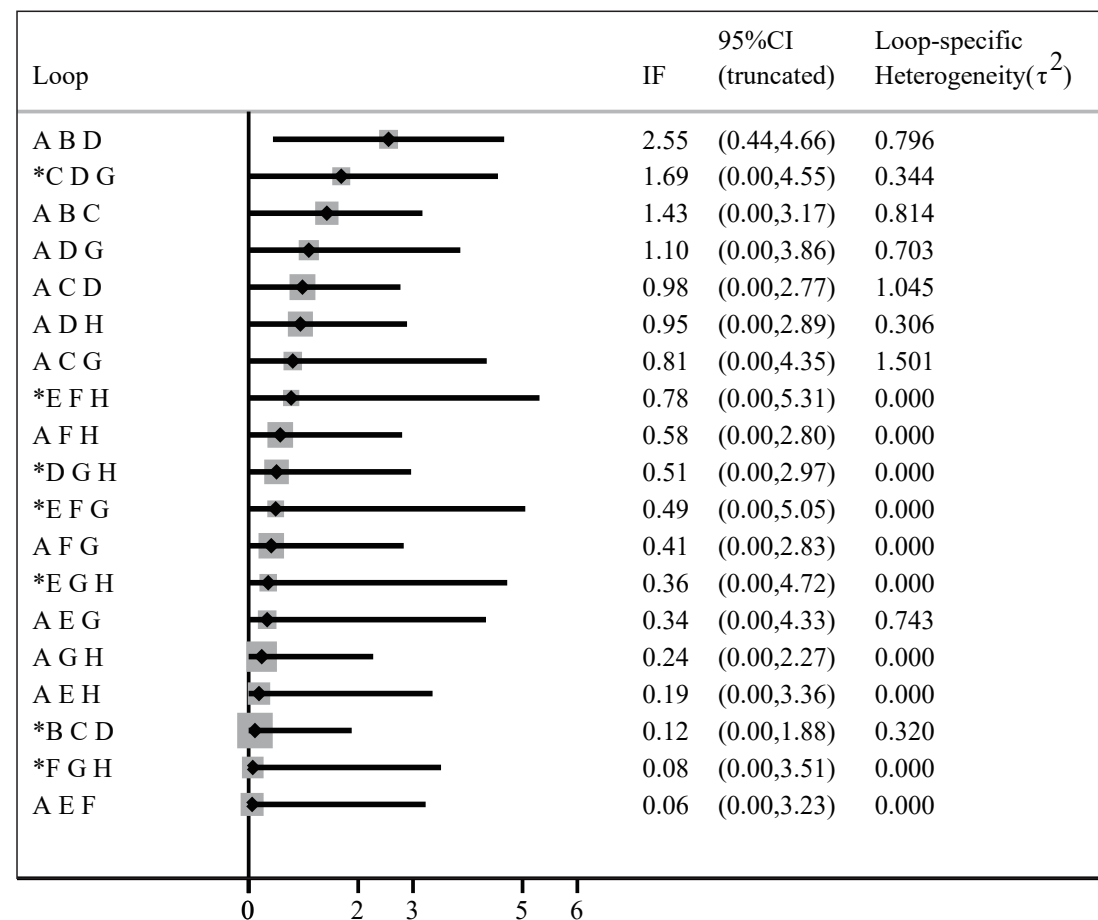

PONV

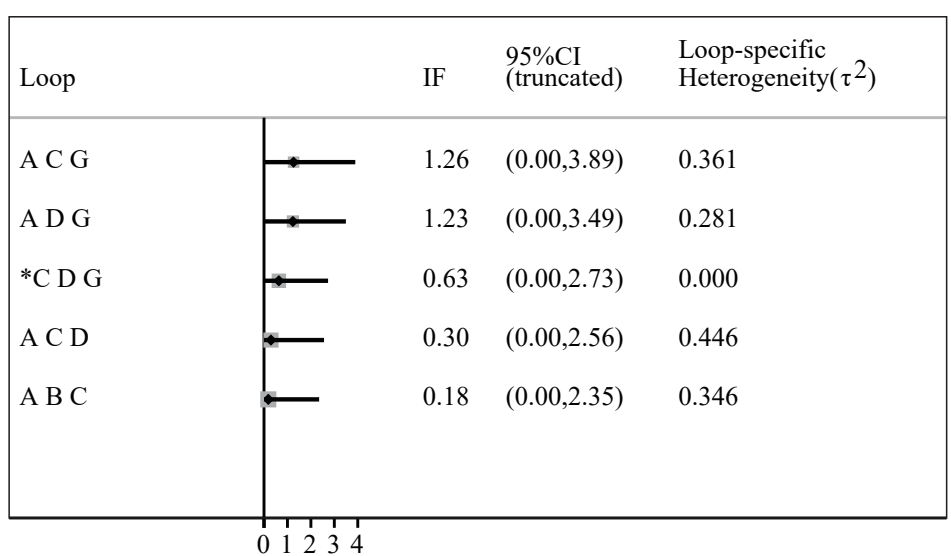

Note: \* These loops are formed only by multi-arm trial(s)

A: PBO; B: PGB 75mg; C: PGB 150mg; D: PGB 300mg; E: GBP 300mg; F: GBP 600mg; G: GBP 900mg; H: GBP 1200mg.

Supplementary material Figure S5

|                                 |                 | Direct comparisons in the network |      |      |      |      |      |     |      |     |      |      |      |      |      |      |      |      |      |      |      |      |     |     |     |     |     |     |     |  |  |  |
|---------------------------------|-----------------|-----------------------------------|------|------|------|------|------|-----|------|-----|------|------|------|------|------|------|------|------|------|------|------|------|-----|-----|-----|-----|-----|-----|-----|--|--|--|
|                                 |                 | A_B                               | A_C  | A_D  | A_E  | A_F  | A_G  | A_H | B_C  | B_D | B_E  | B_F  | B_G  | B_H  | C_D  | C_E  | C_F  | C_G  | C_H  | D_E  | D_F  | D_G  | D_H | E_F | E_G | E_H | F_G | F_H | G_H |  |  |  |
| Network meta-analysis estimates | Mixed estimates | A_B                               | 59.6 | 1.9  | 6.5  | 0.7  | 2.4  | 0.9 | 1.7  | 1.1 | 13.0 | 1.0  | 0.1  | 0.6  | 0.5  | 5.5  | 0.1  | 0.7  | 1.8  | 1.5  | 0.3  | 1.9  |     |     |     |     |     |     |     |  |  |  |
|                                 |                 | A_C                               | 1.3  | 24.0 | 3.1  | 4.8  | 17.1 | 2.5 | 5.0  | 0.4 | 0.9  | 2.1  | 7.4  | 17.6 | 6.2  | 1.9  | 0.1  | 0.6  | 1.8  | 0.1  | 0.8  | 2.3  |     |     |     |     |     |     |     |  |  |  |
|                                 |                 | A_D                               | 8.5  | 4.1  | 27.9 | 2.0  | 6.3  | 3.7 | 9.7  | 0.1 | 8.5  | 3.5  | 12.6 | 4.5  | 0.4  | 3.0  | 1.7  | 8.0  | 10.6 | 2.2  | 1.3  | 0.4  |     |     |     |     |     |     |     |  |  |  |
|                                 |                 | A_E                               | 1.2  | 7.2  | 2.4  | 20.7 | 9.8  | 3.7 | 9.7  | 0.1 | 1.0  | 0.4  | 12.6 | 4.5  | 0.4  | 3.0  | 1.7  | 8.0  | 10.6 | 2.2  | 1.3  | 0.4  |     |     |     |     |     |     |     |  |  |  |
|                                 |                 | A_F                               | 0.9  | 5.7  | 1.9  | 2.3  | 53.1 | 2.2 | 7.3  | 0.1 | 0.8  | 0.3  | 1.2  | 7.7  | 0.3  | 3.4  | 0.7  | 0.4  | 0.1  | 5.4  | 6.6  | 0.7  |     |     |     |     |     |     |     |  |  |  |
|                                 |                 | A_G                               | 2.3  | 5.9  | 5.5  | 4.4  | 13.7 | 9.1 | 10.7 |     | 2.2  | 0.1  | 0.5  | 1.0  | 6.3  | 7.9  | 0.1  | 4.9  | 0.2  | 10.7 | 1.8  | 12.7 |     |     |     |     |     |     |     |  |  |  |
|                                 |                 | A_H                               | 1.1  | 3.2  | 2.4  | 4.2  | 13.1 | 2.9 | 35.1 |     | 1.1  |      | 1.6  | 1.8  | 3.4  | 0.1  | 0.4  | 5.5  | 2.6  | 10.5 | 11.0 |      |     |     |     |     |     |     |     |  |  |  |
|                                 |                 | B_C                               | 21.1 | 9.7  | 1.1  | 2.3  | 7.9  | 0.4 | 2.0  | 3.0 | 13.6 | 3.7  | 5.1  | 9.9  | 6.4  | 8.8  |      | 1.5  | 1.3  | 1.3  | 0.8  | 0.1  |     |     |     |     |     |     |     |  |  |  |
|                                 |                 | B_D                               | 14.6 | 1.2  | 7.4  | 0.7  | 2.4  | 1.0 | 1.8  | 0.9 | 55.4 | 1.6  | 0.1  | 0.4  | 0.9  | 6.5  |      | 0.8  |      | 1.7  | 0.3  | 2.1  |     |     |     |     |     |     |     |  |  |  |
|                                 |                 | C_D                               | 3.0  | 7.6  | 9.4  | 0.9  | 3.8  | 0.2 | 0.3  | 0.6 | 3.6  | 11.1 | 5.4  | 9.2  | 11.5 | 21.2 |      | 3.1  | 1.4  | 4.0  | 1.4  | 2.5  |     |     |     |     |     |     |     |  |  |  |
|                                 |                 | C_E                               |      |      |      |      |      |     |      |     |      |      |      |      |      |      |      |      |      |      |      |      |     |     |     |     |     |     |     |  |  |  |
|                                 |                 | C_F                               | 0.3  | 6.3  | 0.5  | 1.1  | 8.3  | 0.2 | 0.2  | 0.2 | 0.2  | 0.9  | 5.0  | 53.9 | 7.5  | 0.2  | 0.9  | 1.1  | 1.9  | 7.4  | 3.1  | 1.2  |     |     |     |     |     |     |     |  |  |  |
|                                 |                 | C_G                               | 0.4  | 4.7  | 1.1  | 0.2  | 0.7  | 2.0 | 2.0  | 0.2 | 0.6  | 3.2  | 9.2  | 13.8 | 29.5 | 4.1  |      | 6.8  | 2.2  | 10.4 | 2.7  | 6.9  |     |     |     |     |     |     |     |  |  |  |
|                                 |                 | D_G                               | 2.2  | 0.5  | 6.2  | 0.7  | 3.2  | 1.7 | 2.3  | 0.1 | 2.4  | 0.2  | 0.5  | 0.2  | 3.3  | 66.1 |      | 1.1  | 0.1  | 2.9  | 0.4  | 2.9  |     |     |     |     |     |     |     |  |  |  |
|                                 | E_F             | 0.2                               | 1.0  | 6.3  | 7.1  | 10.3 | 0.4  | 1.4 |      | 0.1 | 0.1  | 17.0 | 15.9 | 0.1  | 6.4  | 4.8  | 11.0 | 10.4 | 10.4 | 8.9  | 0.1  |      |     |     |     |     |     |     |     |  |  |  |
|                                 | E_G             | 0.5                               | 0.5  | 1.3  | 4.5  | 0.8  | 1.8  | 0.7 |      | 0.5 | 0.7  | 11.9 | 3.3  | 7.4  | 2.5  | 1.5  | 32.4 | 11.6 | 5.4  | 0.2  | 12.4 |      |     |     |     |     |     |     |     |  |  |  |
|                                 | E_H             |                                   | 1.4  |      | 6.1  | 0.1  | 0.1  | 7.3 |      | 0.3 | 8.6  | 4.5  | 2.4  | 0.4  | 1.5  | 11.7 | 34.6 | 0.2  | 5.9  | 14.8 |      |      |     |     |     |     |     |     |     |  |  |  |
|                                 | F_G             | 0.8                               | 0.1  | 1.8  | 0.7  | 7.8  | 2.3  | 2.1 |      | 0.8 | 0.6  | 2.0  | 9.7  | 7.2  | 3.2  | 0.9  | 3.5  | 0.2  | 35.6 | 9.3  | 11.5 |      |     |     |     |     |     |     |     |  |  |  |
|                                 | F_H             | 0.1                               | 0.3  | 0.4  | 0.6  | 11.2 | 0.5  | 9.9 |      | 0.2 | 0.2  | 3.0  | 5.7  | 2.2  | 0.8  | 0.9  | 0.1  | 4.3  | 11.0 | 34.1 | 14.5 |      |     |     |     |     |     |     |     |  |  |  |
|                                 | G_H             | 0.6                               | 0.7  | 1.3  | 0.1  | 0.5  | 1.6  | 4.7 |      | 0.6 | 0.2  | 0.9  | 1.1  | 2.5  | 2.0  |      | 4.5  | 5.3  | 6.9  | 7.5  | 59.3 |      |     |     |     |     |     |     |     |  |  |  |
| Entire network                  |                 |                                   | 7.7  | 3.9  | 4.1  | 3.3  | 8.3  | 1.5 | 5.6  | 0.4 | 6.3  | 1.8  | 6.4  | 7.3  | 4.6  | 10.1 | 0.7  | 4.7  | 4.5  | 5.6  | 4.8  | 8.4  |     |     |     |     |     |     |     |  |  |  |
| Included studies                |                 |                                   | 3    | 13   | 8    | 6    | 13   | 5   | 14   | 2   | 1    | 2    | 1    | 1    | 1    | 1    | 2    | 1    | 1    | 2    | 2    | 2    |     |     |     |     |     |     |     |  |  |  |

Opioid consumption

|                                 |                 | Direct comparisons in the network |      |      |      |      |      |       |      |      |      |
|---------------------------------|-----------------|-----------------------------------|------|------|------|------|------|-------|------|------|------|
|                                 |                 | A_B                               | A_C  | A_D  | A_E  | A_F  | A_H  | B_C   | C_D  | E_F  |      |
| Network meta-analysis estimates | Mixed estimates | A_B                               | 55.0 | 19.8 | 1.8  |      |      | 21.6  | 1.8  |      |      |
|                                 |                 | A_C                               | 4.8  | 79.7 | 5.3  |      |      | 4.8   | 5.3  |      |      |
|                                 |                 | A_D                               | 1.4  | 16.9 | 62.2 |      |      | 1.4   | 18.2 |      |      |
|                                 |                 | A_E                               |      |      |      | 89.3 | 5.3  |       |      |      | 5.3  |
|                                 |                 | A_F                               |      |      |      | 39.3 | 21.4 |       |      |      | 39.3 |
|                                 |                 | A_H                               |      |      |      |      |      | 100.0 |      |      |      |
|                                 |                 | B_C                               |      |      |      |      |      |       | 54.6 | 1.8  |      |
|                                 |                 | C_D                               | 21.8 | 20.0 | 1.8  |      |      |       | 1.9  | 48.4 |      |
|                                 |                 | E_F                               | 1.9  | 23.0 | 24.9 |      |      |       |      |      | 89.3 |
|                                 |                 | B_D                               |      |      |      | 5.4  | 5.4  |       |      |      |      |
|                                 |                 | B_E                               | 25.5 | 2.0  | 27.5 |      |      |       | 23.5 | 21.5 |      |
|                                 |                 | B_F                               | 27.5 | 12.8 | 1.1  | 38.9 | 2.4  |       | 13.8 | 1.1  | 2.4  |
|                                 |                 | B_H                               | 21.9 | 9.9  | 1.1  | 22.2 | 10.7 |       | 11.0 | 1.1  | 22.2 |
|                                 |                 | C_E                               | 27.5 | 13.2 | 1.3  |      |      | 42.1  | 14.5 | 1.3  |      |
|                                 | C_F             | 3.2                               | 39.9 | 2.7  | 43.1 | 2.7  |      | 3.2   | 2.7  | 2.7  |      |
|                                 | C_H             | 2.4                               | 30.1 | 2.7  | 24.5 | 10.7 |      | 2.4   | 2.7  | 24.5 |      |
|                                 | D_E             | 3.2                               | 39.9 | 3.5  |      |      | 46.6 | 3.2   | 3.5  |      |      |
|                                 | D_F             | 0.8                               | 10.7 | 31.1 | 40.1 | 2.5  |      | 0.8   | 11.5 | 2.5  |      |
|                                 | D_H             | 0.8                               | 8.4  | 24.3 | 22.8 | 10.7 |      | 0.8   | 9.2  | 22.8 |      |
|                                 | E_H             | 1.0                               | 11.2 | 31.1 |      |      | 43.4 | 1.0   | 12.3 |      |      |
|                                 | F_H             |                                   |      |      | 44.7 | 3.6  |      | 48.2  |      | 3.6  |      |
|                                 | F_H             |                                   |      |      | 26.2 | 10.7 |      | 36.9  |      | 26.2 |      |
| Entire network                  |                 |                                   | 9.5  | 16.1 | 10.6 | 18.9 | 4.1  | 15.1  | 7.6  | 6.8  | 11.5 |
| Included studies                |                 |                                   | 1    | 4    | 5    | 1    | 4    | 3     | 1    | 1    | 1    |

Pain score with movement

|                                 |                 | Direct comparisons in the network |      |      |      |      |      |      |      |      |      |      |      |      |      |     |     |      |     |      |     |     |     |     |     |     |     |     |     |  |
|---------------------------------|-----------------|-----------------------------------|------|------|------|------|------|------|------|------|------|------|------|------|------|-----|-----|------|-----|------|-----|-----|-----|-----|-----|-----|-----|-----|-----|--|
|                                 |                 | A_B                               | A_C  | A_D  | A_E  | A_F  | A_G  | A_H  | B_C  | B_D  | B_E  | B_F  | B_G  | B_H  | C_D  | C_E | C_F | C_G  | C_H | D_E  | D_F | D_G | D_H | E_F | E_G | E_H | F_G | F_H | G_H |  |
| Network meta-analysis estimates | Mixed estimates | A_B                               | 46.9 | 12.7 | 12.0 |      |      |      |      |      |      |      |      |      |      |     |     |      |     |      |     |     |     |     |     |     |     |     |     |  |
|                                 |                 | A_C                               | 2.3  | 68.7 | 9.8  | 0.2  | 1.7  | 0.6  | 0.6  | 2.4  | 0.1  | 10.1 | 1.5  | 1.1  | 0.4  | 0.1 |     |      |     |      |     |     |     |     |     |     |     |     |     |  |
|                                 |                 | A_D                               | 2.5  | 11.1 | 66.3 | 0.1  | 0.4  | 0.1  | 2.2  | 0.1  | 2.6  | 11.6 | 0.3  | 0.2  | 2.3  |     |     |      |     |      |     |     |     |     |     |     |     |     |     |  |
|                                 |                 | A_E                               |      |      |      |      |      |      |      |      |      |      |      |      |      |     |     |      |     |      |     |     |     |     |     |     |     |     |     |  |
|                                 |                 | A_F                               | 0.1  | 1.6  | 0.3  | 5.8  | 76.8 | 1.6  | 1.8  | 0.1  | 0.2  | 1.6  | 0.3  | 0.2  | 5.8  |     |     |      |     |      |     |     |     |     |     |     |     |     |     |  |
|                                 |                 | A_G                               | 0.2  | 5.1  | 1.1  | 3.1  | 14.8 | 32.7 | 8.0  | 0.2  | 0.9  | 0.2  | 6.0  | 0.2  | 2.5  |     |     |      |     |      |     |     |     |     |     |     |     |     |     |  |
|                                 |                 | A_H                               | 0.1  | 0.6  | 2.0  | 0.9  | 2.0  | 1.0  | 85.4 |      | 0.1  | 0.4  | 0.2  | 0.2  | 2.5  |     |     |      |     |      |     |     |     |     |     |     |     |     |     |  |
|                                 |                 | B_C                               | 21.2 | 21.5 | 1.1  | 0.1  | 0.5  | 0.2  |      | 31.6 | 11.9 | 10.7 | 0.5  | 0.4  | 0.1  | 0.1 |     |      |     |      |     |     |     |     |     |     |     |     |     |  |
|                                 |                 | B_D                               | 21.0 | 0.8  | 21.1 |      |      |      |      | 0.7  | 12.2 | 32.0 | 11.3 |      |      |     |     |      |     |      |     |     |     |     |     |     |     |     |     |  |
|                                 |                 | C_D                               | 0.1  | 23.2 | 23.3 | 0.1  | 0.6  | 0.2  | 0.6  | 2.8  | 2.8  | 44.0 | 0.6  | 0.5  | 0.9  | 0.1 |     |      |     |      |     |     |     |     |     |     |     |     |     |  |
|                                 |                 | C_E                               | 1.1  | 32.8 | 5.2  | 2.7  | 35.3 | 0.5  | 0.5  | 1.1  | 0.1  | 5.7  | 6.3  | 1.9  | 0.5  | 2.8 |     |      |     |      |     |     |     |     |     |     |     |     |     |  |
|                                 |                 | C_F                               | 0.8  | 24.8 | 4.0  | 1.5  | 8.7  | 15.8 | 3.6  | 0.9  | 0.1  | 4.6  | 1.9  | 15.5 | 0.7  | 0.5 | 1.0 |      |     |      |     |     |     |     |     |     |     |     |     |  |
|                                 |                 | D_H                               | 1.2  | 6.6  | 31.1 | 0.4  | 0.7  | 0.4  | 37.4 | 0.1  | 1.3  | 7.3  | 0.4  | 0.5  | 10.1 |     |     |      |     |      |     |     |     |     |     |     |     |     |     |  |
|                                 |                 | E_F                               | 0.2  | 3.0  | 0.1  | 27.5 | 26.1 | 0.5  | 4.1  |      | 0.1  | 0.7  | 0.1  | 3.8  | 39.2 | 1.0 | 1.0 | 1.8  | 0.9 | 0.2  |     |     |     |     |     |     |     |     |     |  |
|                                 | E_G             |                                   | 0.1  | 0.9  | 33.3 | 6.2  | 0.1  | 38.4 |      | 0.1  | 0.3  | 0.2  | 1.3  | 9.3  | 1.0  | 3.8 | 0.9 | 1.9  | 2.0 |      |     |     |     |     |     |     |     |     |     |  |
|                                 | E_H             | 0.1                               | 2.2  | 0.5  | 0.9  | 20.6 | 14.8 | 4.0  |      | 0.1  | 0.4  | 1.2  | 3.9  | 0.1  | 3.0  | 2.0 | 0.1 | 39.8 | 1.0 | 5.2  |     |     |     |     |     |     |     |     |     |  |
|                                 | F_G             | 0.3                               | 0.7  | 3.2  | 36.1 | 0.3  | 39.2 |      |      | 0.1  | 0.7  | 0.9  | 0.1  | 1.5  | 4.1  |     |     |      |     |      |     |     |     |     |     |     |     |     |     |  |
|                                 | G_H             | 0.1                               | 2.7  | 0.1  | 1.6  | 8.4  | 15.4 | 28.1 |      | 0.1  | 1.3  | 0.1  | 4.0  | 1.4  | 0.8  | 1.6 | 0.7 | 11.0 | 1.8 | 20.8 |     |     |     |     |     |     |     |     |     |  |
|                                 | B_E             | 23.4                              | 5.9  | 7.6  | 30.5 | 5.8  | 0.3  | 0.3  | 7.0  | 8.4  | 0.2  | 0.7  | 0.5  | 0.6  | 6.9  | 0.6 | 0.7 | 0.3  | 0.1 | 0.1  |     |     |     |     |     |     |     |     |     |  |
|                                 | B_F             | 23.3                              | 5.9  | 7.6  | 2.8  | 32.9 | 0.7  | 0.4  | 8.5  | 8.5  | 0.3  | 2.2  | 0.7  | 0.6  | 2.9  |     |     |      |     |      |     |     |     |     |     |     |     |     |     |  |
|                                 | B_G             | 20.8                              | 3.5  | 5.1  | 1.5  | 7.1  | 16.1 | 4.7  | 10.4 | 6.5  | 0.6  | 0.6  | 6.9  | 0.8  | 0.5  | 1.0 |     |      |     |      |     |     |     |     |     |     |     |     |     |  |
|                                 | B_H             | 23.3                              | 7.8  | 6.0  | 0.4  | 0.7  | 0.4  | 35.7 | 8.8  | 9.6  |      | 0.4  | 0.6  | 3.5  | 8.0  | 1.0 |     |      |     |      |     |     |     |     |     |     |     |     |     |  |
|                                 | C_E             | 1.1                               | 33.7 | 4.7  | 33.9 | 5.3  | 0.1  | 0.4  | 1.2  | 0.1  | 5.2  | 2.0  | 1.5  | 0.5  | 8.0  | 1.0 |     |      |     |      |     |     |     |     |     |     |     |     |     |  |
|                                 | C_H             | 1.2                               | 33.4 | 5.1  | 0.3  | 0.2  | 0.2  | 39.0 | 1.3  | 0.1  | 8.3  | 1.6  | 1.7  | 3.4  | 0.1  |     |     |      |     |      |     |     |     |     |     |     |     |     |     |  |
|                                 | D_E             | 1.2                               | 5.4  | 32.9 | 33.7 | 5.8  | 0.2  | 0.2  | 0.1  | 1.3  | 6.5  | 0.7  | 0.5  | 1.9  | 7.0  | 0.6 |     |      |     |      |     |     |     |     |     |     |     |     |     |  |
|                                 | D_F             | 1.2                               | 5.6  | 32.6 | 2.8  | 36.0 | 0.6  | 0.1  | 1.3  | 8.2  | 2.1  | 0.7  | 2.0  | 2.9  |      |     |     |      |     |      |     |     |     |     |     |     |     |     |     |  |
|                                 | D_G             | 1.0                               | 2.9  | 26.3 | 1.6  | 9.4  | 16.1 | 3.0  | 0.2  | 1.2  | 10.1 | 0.6  | 6.8  | 2.7  | 0.6  | 1.0 |     |      |     |      |     |     |     |     |     |     |     |     |     |  |
| Entire network                  |                 |                                   | 6.9  | 11.5 | 11.0 | 10.1 | 12.7 | 4.8  | 12.2 | 3.7  | 3.6  | 5.4  | 1.0  | 2.1  | 1.4  | 4.4 | 0.7 | 0.5  | 4.7 | 0.8  | 2.5 |     |     | </  |     |     |     |     |     |  |
